# Supplementary material for: Anisotropic nanocluster arrays to a diminished zone: different regimes of surface deposition of gold nanocolloids
Source: Royal Society of Chemistry journal article supplement (doi:10.1039/d2sm01625g), 2023-01-01
Supplement: d2sm01625g3.pdf [file d2sm01625g3.pdf]

1  
2  
3  
4  
5  
6  
7  
8  
9  
10  
11  
12  
13  
14  
15  
16  
17  
18  
19  
20  
21  
22  
23  
24  
25  
26  
27  
28

# Anisotropic Nanocluster Arrays to Diminished Zone: Different regimes of surface deposition in gold nanocolloids

Sanjoy Khawas,<sup>a</sup> and Sunita Srivastava <sup>\*a</sup>

<sup>a</sup> Department of Physics, Indian Institute of Technology Bombay, Powai, India, Maharashtra-400076

## 1 Synthesis and characterization

### 1.1 Materials

Chloroauric acid ( $HAuCl_4 \cdot 3H_2O$ ) was purchased from Honeywell Fluka. Cetyltrimethylammonium bromide (CTAB), sodium borohydride ( $NaBH_4$ ) and L-ascorbic acid ( $C_6H_8O_6$ ) were purchased from Spectrochem. Silver nitrate ( $AgNO_3$ ), acetone, sulphuric acid and hydrogen peroxide were obtained from Merck's life science.

### 1.2 Synthesis of monodisperse gold nanorods

Highly monodisperse gold nanorods (AuNR) were synthesized by a seed-mediated growth process<sup>1</sup>. At the initial stage of the synthesis, seed solution was prepared by mixing the CTAB solution (0.2M, 5ml) and gold solution (0.5mM, 5ml) followed by the addition of freshly prepared ice-cold  $NaBH_4$  (10mM, 600 $\mu$ L) under vigorous stirring for 2 minutes at 1000rpm. The color of the seed solution turns gray. The seed solution was kept at room temperature for 30minutes before use. Growth solution was prepared by proper addition of gold solution (5mM, 9ml) and silver nitrate solution (0.1M, 112 $\mu$ L) into the CTAB solution and then HCl (1.2M, 112 $\mu$ L) was added into the mixer. Then mild freshly prepared reducing agent ascorbic acid (10mM, 5.5ml) was added under mild stirring (at 800rpm for 10s) after which the blend turned into a colorless solution. Finally, 75 $\mu$ L of seed solution was added to the growth solution and stirred gently for 10s and then kept for particle growth at room temperature for 12hrs. Then the desired volume of growth solution was centrifuged twice at 12000rpm for 15min to remove the excess CTAB and other contaminants. The final suspension was stored in a dark place at room temperature for further use.

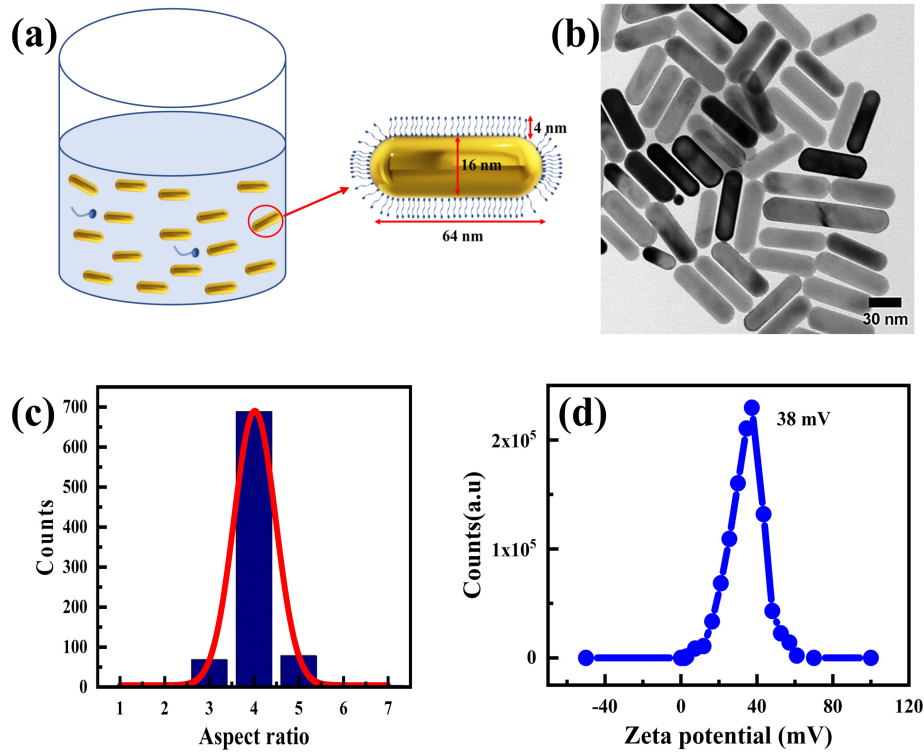

**Fig. S1** (a) Schematic of CTAB-AuNR suspension. (b) TEM image of synthesized CTAB-AuNR. (c) Size distribution estimates from TEM images indicating fairly mono disperse gold nanorods. (d) Zeta potential estimate of the CTAB coated AuNR showing positive surface charge and stable dispersion.

### 29 1.3 Characterization

30 The quality of synthesized AuNRs was characterized by UV-visible spectroscopy (Jasco V-730), TEM(JEOL  
 31 2100-F) and zetasizer(Nano ZS). The position of longitudinal and transverse resonance peaks is at  $750\text{nm}$   
 32 and  $510\text{nm}$  respectively. The average length of AuNRs is  $63.37 \pm 0.10 \text{ nm}$  and the average diameter  $16.37 \pm$   
 33  $0.05 \text{ nm}$  with a statistical aspect ratio  $4.03$ . The zeta potential of the growth solution is approximately  
 34  $+46\text{mV}$  (Fig. S1).

## 35 2 Calculation for interaction potential energy of the ordered AuNR as- 36 ssembly nanostructures

37 The assembly of AUNRs is primarily assembled into an order structures under the influence of dipole-  
 38 dipole interaction( $U_d$ ), Vanderwaal's interaction( $U_{vw}$ ) and depletion interaction( $U_{dep}$ ). An estimate of  
 39 total interaction potential foe side-side AuNRs assembly is given below.

$$U_{total} = U_d + U_{vw} + U_{dep} \quad (1)$$

40

$$U_d = -\frac{\mu_1 \mu_2}{4\pi \epsilon \epsilon_0 d^3} \quad (2)$$

41 where  $\mu_1 = \mu_2 = 2.4 \times 10^{-25} C.m$ ,  $\epsilon = 80$  is the relative permittivity and  $\epsilon_0 = 8.85 \times 10^{-12} F/m$  is per-  
 42 mittivity of the free space.  $d = 20nm$  is the separation between nanorods including CTAB layer. The  
 43 dipole-dipole interaction among the nanorods for the side-side configuration can be approximated as  
 44  $196K_B T$ .

$$U_{Vw} = -\frac{Alr^{1/2}}{24d^{3/2}} \quad (3)$$

45 where  $A = 4 \times 10^{-19} J$  is the Helmer constant,  $l = 63nm$  length of nanorods,  $r = 8nm$  is the radius of  
 46 nanorods. The Vanderwaal's interaction for the side-side configuration can be approximated as  $8K_B T$ .

$$U_{dep} = -P_o V_{op} = -n_c RT \times V_{op} \quad (4)$$

47 where  $n_c$  is the micell concentration, R the is universal gas constant and T is temperature and  $V_{op}$  is  
 48 overlap volume. The attractive depletion interaction potential  $\approx 3K_B T$ .

### 49 **3 In-situ evaporation kinetics of the drying sessile drop of anisotropic** 50 **colloidal suspensions**

51 The droplet life span at different stages changes with concentration, as discussed in the paper in details.  
 52 The variation in the evaporation profile is presented below in normalized time scale (Fig. S2). The rela-  
 53 tive time scale for various modes of evaporation for the individual AuNRs suspension is tabulated in Table  
 54 S2. The distinction between the initial droplet diameter and the ring diameter from Table S1, clearly  
 55 indicates the autophobic effect at lower concentrations and early stage pinning of TPCL at higher concen-  
 tration regime.

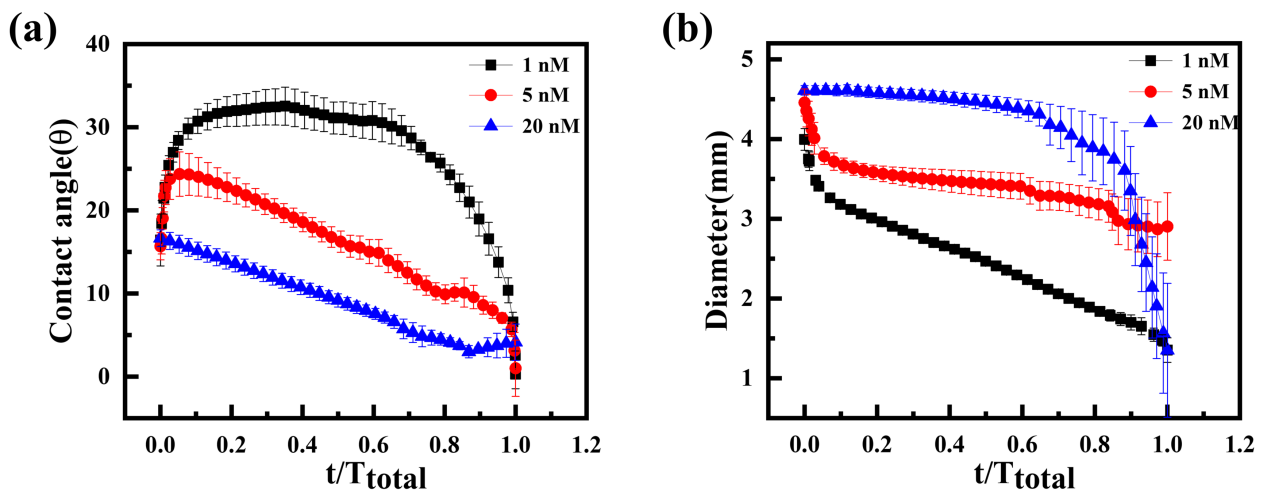

Fig. S2 The *in-situ* drying profile showing (a) contact angle( $\theta$ ) and (b) diameter vs the normalised droplet evaporation time. Different modes of evaporation can be seen which gradually evolves into a single mode with an increase in particle concentration.

**Table 1 Comparison of droplet diameter immediately after dropcast and ring diameter after complete evaporation of the droplet for different AuNR concentrated suspension.**

| AuNR concentration( <i>nM</i> ) | Droplet diameter(mm) | Ring diameter(mm) | Difference( $\Delta R$ in mm) |
|---------------------------------|----------------------|-------------------|-------------------------------|
| 1                               | 3.95                 | 2.212             | 1.738                         |
| 2.5                             | 3.86                 | 2.264             | 1.596                         |
| 5                               | 4.39                 | 2.41              | 1.98                          |
| 10                              | 3.69                 | 3.496             | 0.194                         |
| 20                              | 4.67                 | 4.225             | 0.445                         |

57

**Table 2 Droplet life span at different mode of evaporation for various AuNR concentration.**

| AuNR concentration( <i>nM</i> ) | Dipinning stage( $t_d/T_{total}$ ) | CCA( $t_{CCA}/T_{total}$ ) | Collopse( $t_{col}/T_{total}$ ) |
|---------------------------------|------------------------------------|----------------------------|---------------------------------|
| 1                               | 0.1                                | 0.7                        | 0.2                             |
| 5                               | 0.07                               | 0.84                       | 0.09                            |
| 20                              | absent                             | 0.85                       | 0.15                            |

#### 58 4 Surface properties at varying AuNR/CTAB concentration

59 The CTAB in the bilayer and residual free CTAB present in the suspension plays a vital role in controlling the pattern morphology. CTAB is a surface-active molecule that reduces the surface tension of the solvent.

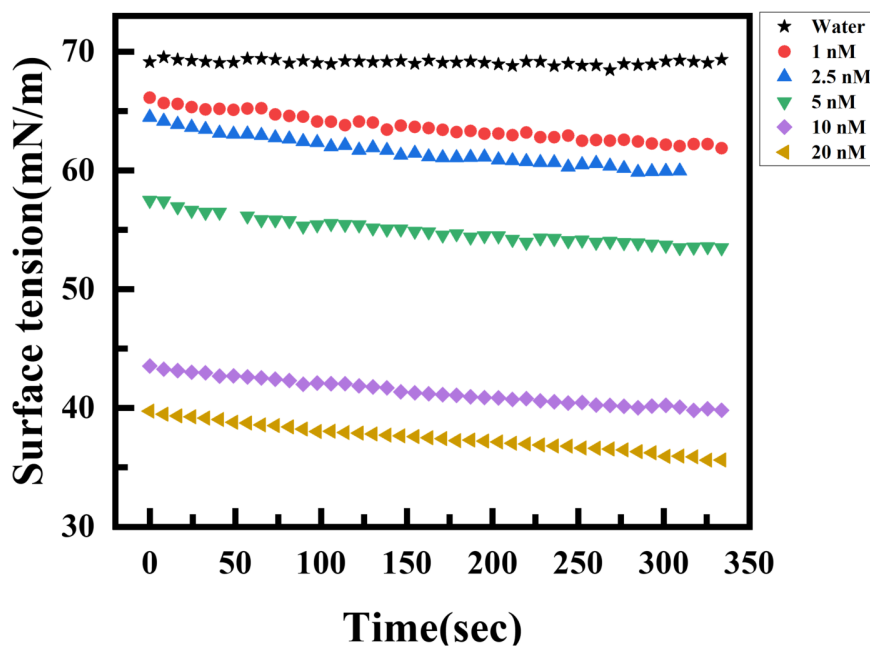

**Fig. S3** The estimate of the surface tension values of the AuNR suspension for different concentrations in pendant drop mode. The surface tension at the air-water interface were found to decrease with increase in AuNR concentration.

60

61 Non-uniform accumulation of CTAB during evaporation may alternate the regular fluid dynamics across  
62 the droplet, resulting in variation in the deposited morphology. The CTAB concentration in the suspension  
63 increases with the nanorods concentration (Fig.S3). The surface tension of the different concentrated  
64 suspensions was measured using a contact angle meter in pendant drop mode for the initial 350s when  
65 the CTAB and nanorods are distributed homogeneously across the pendant drop. The surface tension of  
66 1nM AuNR suspension  $\approx 66$  mN/m while it decreased to 40 mN/m for the 20nM suspension commencing  
67 the higher CTAB concentration in 20nM AuNR suspension.

## 68 5 Surface morphologies at varying nanoparticle concentration

69 The middle region of the coffee ring contains scatter nanoclusters of AuNR. But the number of cluster  
70 significantly increases at higher concentrations because of a larger fraction of rods captured by the inter-  
face which later directly transferred to the substrate. The stronger inward Marangoni flow also plays

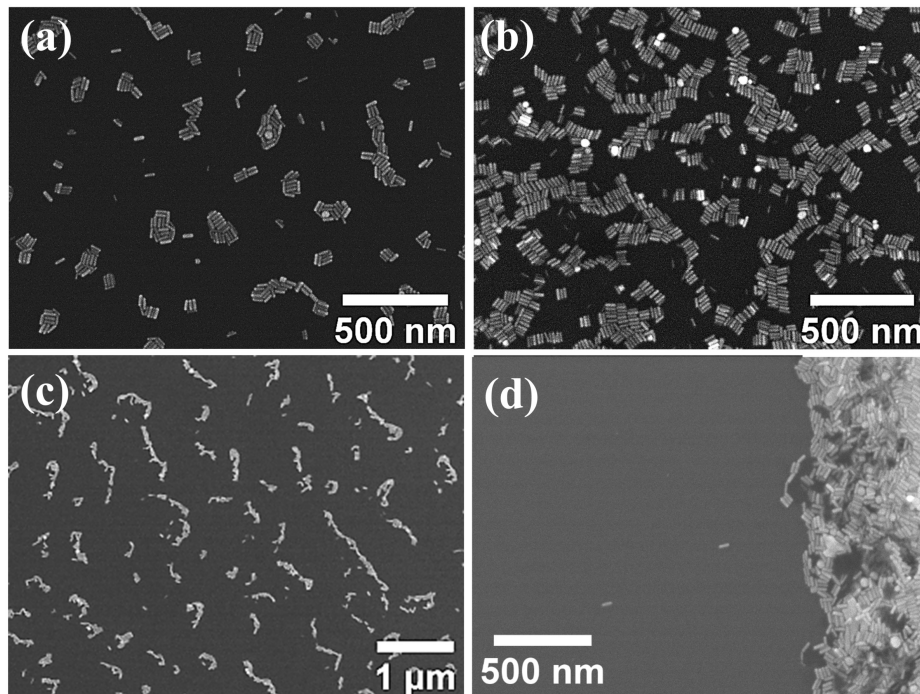

**Fig. S4** (a-b) SEM images showing the morphology in *region 4* of the dried particulate at 1nM and 20nM respectively. (c-d) The morphology outside the coffee-ring deposit, *region 1*, for 1nM and 20nM respectively. The nanocluster array deposition can be seen for 1nM sample, whereas *region 1* lacks the same for 20nM AuNR suspension.

71  
72 an important role in pulling the AuNR towards the droplet center. For the same reason, large no. of  
73 nanoclusters at the middle of the 20 nM deposition observed compared to 1 nM deposition as shown in  
74 Fig. S4(a,b). The outer nanoclusters region appears at lower concentrations due to autophobe-induced  
75 depinning of the TPCL which is shown Fig. S4(c) for 1 nM suspension, while it disappears at a higher  
76 concentration as shown in Fig. S4(d) for 20 nM suspension. The particle arrangement within the coffee

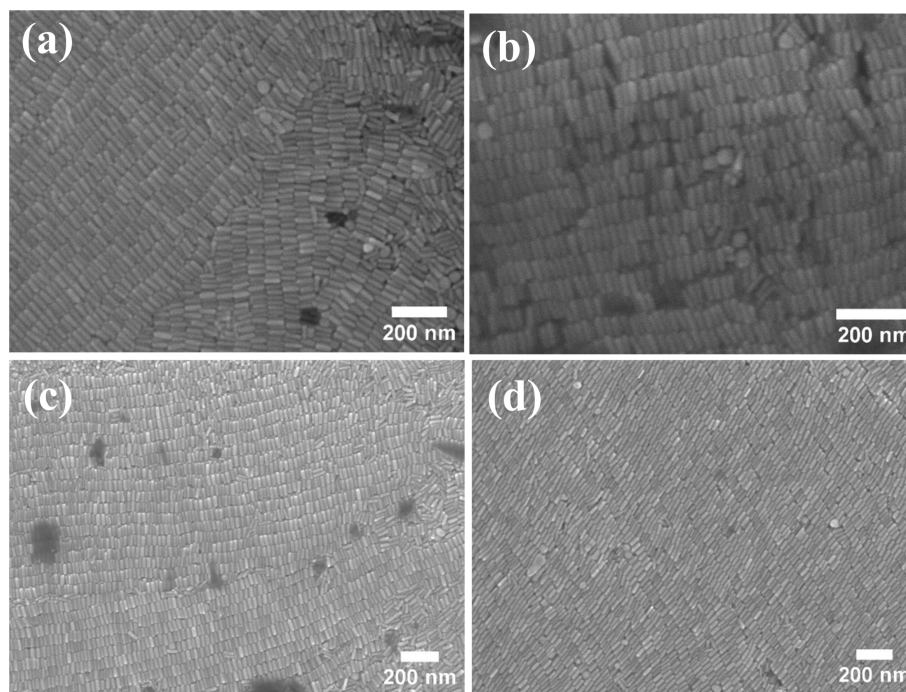

**Fig. S5** The internal nanoscale arrangements of AuNR within the coffee-ring showing smectic ordering at varying AuNR concentrations (a)  $1\text{ nM}$ , (b)  $2.5\text{ nM}$ , (c)  $10\text{ nM}$  and (d)  $20\text{ nM}$ . The ordering improves with an increase in particle concentration.

77 ring for various concentrations shown in Fig. S5. The area of the ordered domains increases with AuNR  
 78 concentrations as reported in our previous work<sup>2</sup>.

79 To identify the role of CTAB on the final deposition pattern, drying experiments were performed with  
 80  $1\text{ nM}$  AuNR suspension with additional CTAB of different concentrations. Different CTAB concentrated  
 81 AuNR suspensions were made by adding the additional CTAB e.g.  $0.1\text{ mM}$ ,  $0.4\text{ mM}$ ,  $0.5\text{ mM}$  and  $1\text{ mM}$  in  
 82  $1\text{ nM}$  AuNR suspension. The variation in the width of the ring for various CTAB concentrations is shown  
 83 in Fig. S6. The width of the ring from  $0.1\text{ mM}$  suspension is a compact one, while for  $0.4\text{ mM}$  and  $0.5\text{ mM}$ ,  
 84 the width is heterogeneous and tends to thin towards the inner side of the ring. For  $1\text{ mM}$  CTAB added  
 85 suspension, diminished ring is formed at the inner side which is two or three layer thick, marked as region  
 86  $2b$  in Fig. S6(d) while region  $2a$  is thicker with 10-12 AuNR layer. The thinning of ring width towards the  
 87 inner side of the ring reported previously due to the thermocapillary Marangoni flow<sup>3,4</sup>. In our case, a lo-  
 88 cal CTAB-dense region is formed near *TPCL* during evaporation which induces an inward solutocapillary  
 89 Marangoni flow. A higher fraction of CTAB in the suspension persuades a strong inward flow which tends  
 90 to carry the particles from *TPCL* to the apex of the droplet and form a diminished ring at the inner side of  
 91 the ring.

92

93 The presence of a larger fraction of CTAB in higher concentrated suspension affects both the ring width

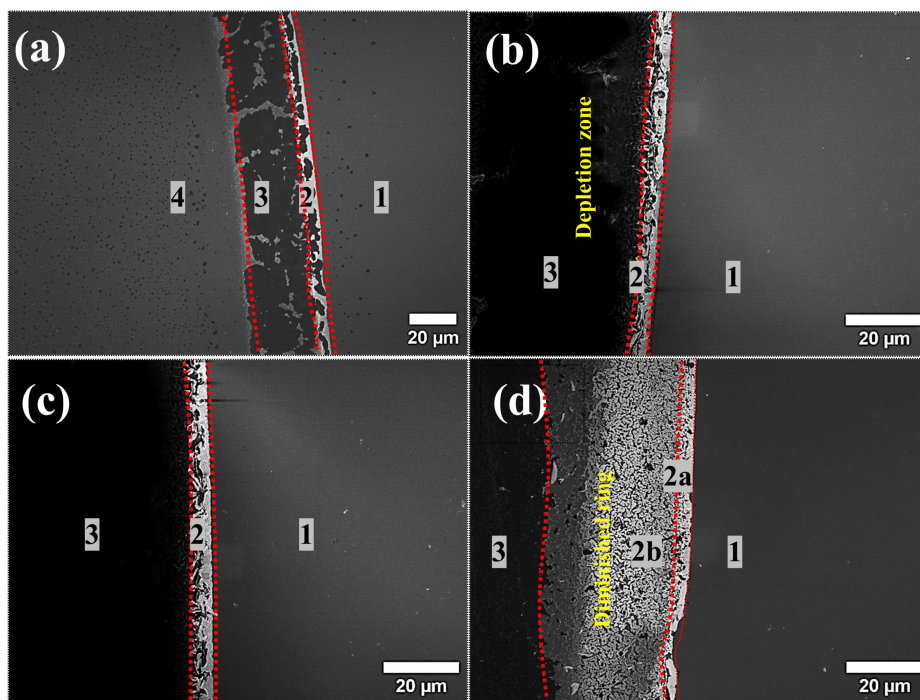

**Fig. S6** (a-d) SEM images for 1nM AuNR suspension with added 0.1mM, 0.4mM, 0.5mM and 1mM concentration of CTAB molecules, respectively. The variation in surface morphology due to inward solutal Marangoni flow induced by larger amount of CTAB at higher AuNRs concentration is evident.

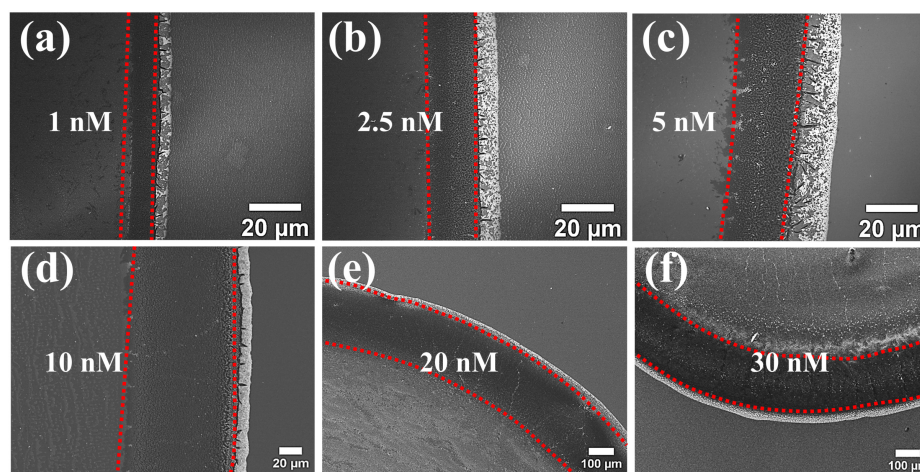

**Fig. S7** Surface morphology of the dried particulate using SEM at indicated AuNR concentration. (a-c) shows the enhancement in the depletion zone with nanorods concentration. (d-f) The depletion zone width saturates at higher AuNRs concentration (beyond 10 nM). The scale bars are marked alongside each image.

94 and depletion zone in the inner vicinity of the coffee ring. Initially depletion zone get enhanced and then  
 95 almost saturates at higher AuNR concentration Fig. S7. Beyond a certain AuNR concentration ( $\geq 30nM$ ),  
 96 depletion zone morphology changes significantly Fig. S8. We examined the width as well as depletion  
 97 zone of the deposited pattern from different concentrated AuNR suspensions using a Stylus Profilometer.

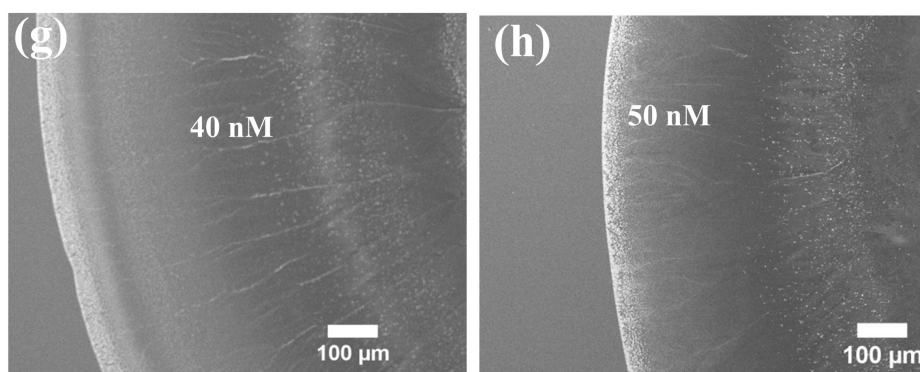

**Fig. S8** Surface morphology using SEM at AuNR concentration of 40 nM (g) and 50nM (h). Significant change in surface morphology were observed with formation of uniform deposition for these samples.

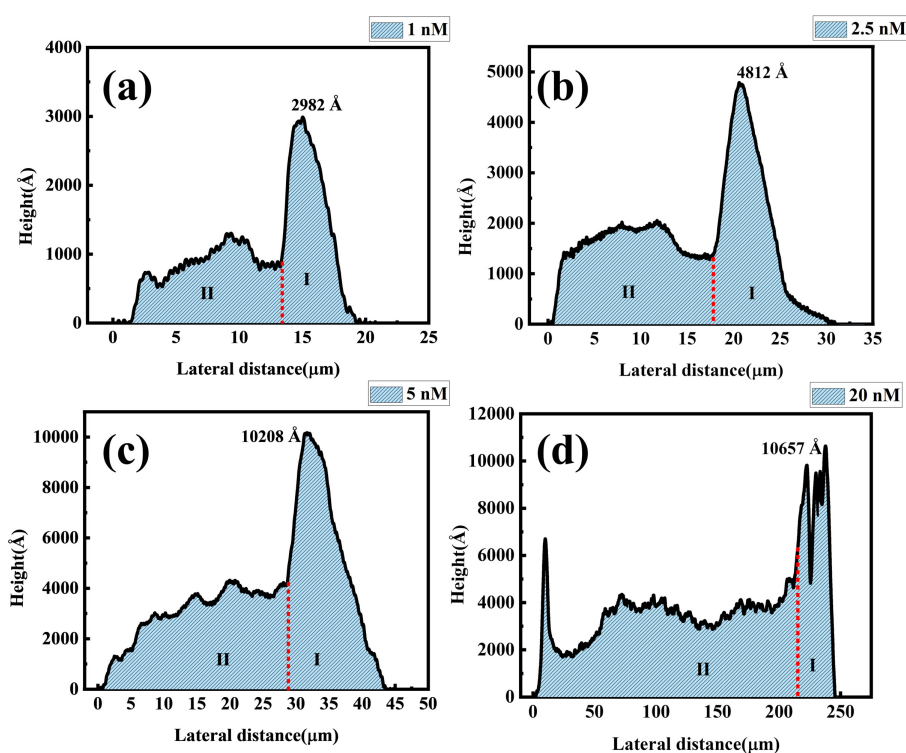

**Fig. S9** (a)-(d) The profilometer data to estimate the ring width(I) and depletion zone width(II) at varying nanoparticle concentration, as indicated alongside each graph.

98 Both the ring width and depletion zone, marked as I and II in Fig. S9 show an incremental tendency with  
 99 AuNR concentration consistent with the SEM analysis. The height of the ring and depletion zone (region  
 100 II) also gets increased with AuNR concentration, indicating the more significant fraction of AuNR and  
 101 CTAB deposition in the I and II, respectively at higher AuNR concentration.

102



## 103 **6 In-situ video of the drying droplet using confocal microscope**

### 104 **6.1 Movie 1 (Avaliable online)**

105 Shows the various phases of *TPCL* motion during the evaporation for 1nM AuNR suspension. Initial re-  
106 ceding of *TPCL* due to autophobic effect leads to outer nanocluster region. The pinning stage of *TPCL*  
107 promotes coffee ring formation. The *TPCL* receding at the final stage of drying leads to the appearance  
108 of the depletion zone and the central nanocluster region.

109

### 110 **6.2 Movie 2 (Avaliable online)**

111 Shows the various phases of *TPCL* motion during the evaporation for 20nM AuNR suspension. Initial  
112 strong pinning of the *TPCL* is correlated with the absence of of the outer nanocluster deposition in region  
113 1. At the collapse state, comparatively early stage receding of the *TPCL* for a longer period of time leads  
114 to the wider depletion zone at 20nM AuNR suspension.

115

## 116 **Notes and references**

117 1 B. Nikoobakht and M. A. El-Sayed, *Chemistry of Materials*, 2003, **15**, 1957–1962.

118 2 A. Zaibudeen, S. Khawas and S. Srivastava, *Colloid and Interface Science Communications*, 2021, **44**,  
119 100492.

120 3 N. D. Patil, P. G. Bange, R. Bhardwaj and A. Sharma, *Langmuir*, 2016, **32**, 11958–11972.

121 4 S. Chatterjee, M. Kumar, J. S. Murallidharan and R. Bhardwaj, *Langmuir*, 2020, **36**, 8407–8421.
